# Supplementary material
Source: PubMed Central journal article supplement (PMC6777223)
Supplement: jamapsychiatry-77-52-s001.pdf [file jamapsychiatry-77-52-s001.pdf]

## Supplementary Online Content

de Wit AE, Booij SH, Giltay EJ, Joffe H, Schoevers RA, Oldehinkel AJ. Association of oral contraceptives with depressive symptoms among adolescents and young women.

*JAMA Psychiatry*. Published online October 2, 2019.

doi:10.1001/jamapsychiatry.2019.2838

**eTable 1.** Sociodemographic and Clinical Characteristics of Included and Excluded Girls Per Wave

**eTable 2.** Associations Between OCP Use and Depressive Symptom Scores During 9 Years of Follow-up

**eTable 3.** Post Hoc Comparison of Sociodemographic and Clinical Variables Among OCP Users and Nonusers at Age 16 Years and at Age 13 Years When OCP Use Was Unlikely

This supplementary material has been provided by the authors to give readers additional information about their work.

**eTable 1.** Sociodemographic and Clinical Characteristics of Included and Excluded Girls Per Wave

| Characteristic                        | 16 years of age  |                  |                      | 19 years of age  |                  |                      | 22 years of age  |                  |                      | 25 years of age  |                 |                      |
|---------------------------------------|------------------|------------------|----------------------|------------------|------------------|----------------------|------------------|------------------|----------------------|------------------|-----------------|----------------------|
|                                       | Included (n=845) | Excluded (n=107) | P Value <sup>a</sup> | Included (n=903) | Excluded (n=282) | P Value <sup>a</sup> | Included (n=826) | Excluded (n=111) | P Value <sup>a</sup> | Included (n=743) | Excluded (n=49) | P Value <sup>a</sup> |
| Age, mean (SD), y                     | 16.2 ± 0.7       | 16.5 ± 0.9       | .005                 | 19.0 ± 0.6       | 19.5 ± 0.6       | <.001                | 22.2 ± 0.7       | 22.5 ± 0.6       | <.001                | 25.6 ± 0.6       | 25.8 ± 0.6      | .04                  |
| Dutch ethnicity, No./total No. (%)    | 745/845 (88.2)   | 238/287 (82.9)   | .03                  | 799/903 (88.5)   | 184/229 (80.3)   | .002                 | 736/826 (89.1)   | 247/306 (80.7)   | <.001                | 669/743 (90.0)   | 314/389 (80.7)  | <.001                |
| SES, mean (SD) <sup>b</sup>           | 0.07 ± 0.77      | -0.27 ± 0.77     | <.001                | 0.05 ± 0.76      | -0.34 ± 0.79     | <.001                | 0.09 ± 0.76      | -0.33 ± 0.77     | <.001                | 0.11 ± 0.76      | -.29 ± 0.76     | <.001                |
| BMI, mean (SD)                        | 21.7 ± 3.1       | 21.8 ± 3.8       | .82                  | 23.1 ± 3.9       | 23.9 ± 5.9       | .26                  | 23.7 ± 4.4       | 23.4 ± 4.9       | .66                  | 24.1 ± 4.7       | 24.0 ± 5.2      | .86                  |
| Virgin, No./total No. (%)             | 498/836 (59.6)   | 22/43 (51.2)     | .34                  | 242/900 (26.9)   | 2/8 (25.0)       | 1.00                 | 1/19 (5.3)       | 98/825 (11.9)    | .72                  | 42/697 (5.7)     | 0/24 (0.0)      | .64                  |
| Age at menarche, mean (SD), y         | 12.9 ± 1.2       | 12.9 ± 1.2       | .98                  | 12.9 ± 1.2       | 12.7 ± 1.4       | .31                  | 12.9 ± 1.2       | 12.8 ± 1.1       | .65                  | 12.9 ± 1.3       | 12.9 ± 1.1      | .91                  |
| Antidepressant use, No./total No. (%) | 1/845 (0.1)      | 1/287 (0.3)      | .44                  | 10/903 (1.1%)    | 0/229 (0.0)      | .23                  | 22/826 (2.7)     | 1/306 (0.3)      | .009                 | 31/743 (4.2)     | 1/389 (0.3)     | <.001                |
| Depressive symptom score, mean (SD)   | 0.36 ± 0.30      | 0.31 ± 0.22      | .33                  | 0.36 ± 0.33      | 0.22 ± 0.19      | .001                 | 0.38 ± 0.33      | 0.25 ± 0.31      | .09                  | 0.43 ± 0.36      | 0.39 ± 0.33     | .44                  |

Abbreviations: BMI, body mass index (calculated as weight in kilograms divided by height in meters squared); SES, socioeconomic status. All variables were assessed at every wave, except for SES, ethnicity, and menarche; the first 2 were determined at study entry (T1) and the latter at age 16 years (T3).

<sup>a</sup> Based on 2-tailed  $\chi^2$  tests for dichotomous variables or t tests for continuous variables.

<sup>b</sup> Continuous scale based on the educational level, job, and income of the parents.

**eTable 2.** Associations Between OCP Use and Depressive Symptom Scores During 9 Years of Follow-up

|                                         | N users vs nonusers | Depressive symptom score |         |
|-----------------------------------------|---------------------|--------------------------|---------|
|                                         |                     | B (95%CI)                | P Value |
| <i>Users vs. nonusers</i>               |                     |                          |         |
| OCP use                                 | 1806 vs 1507        | 0.007 (-0.013; 0.026)    | .50     |
| Adjusted OCP use <sup>a</sup>           | 1782 vs 1483        | 0.006 (-0.013; 0.025)    | .52     |
| 16 year old users                       | 300 vs 530          | 0.075 (0.031; 0.120)     | <.001   |
| 19 year old users                       | 606 vs 285          | 0.013 (-0.033; 0.060)    | .57     |
| 22 year old users                       | 534 vs 278          | -0.013 (-0.061; 0.034)   | .59     |
| 25 year old users                       | 342 vs 390          | -0.032 (-0.083; 0.020)   | .23     |
| <i>First-time users vs. never users</i> |                     |                          |         |
| OCP use                                 | 828 vs 1071         | 0.026 (0.002; 0.050)     | .03     |
| Adjusted OCP use <sup>a</sup>           | 818 vs 1054         | 0.021 (-0.005; 0.046)    | .11     |

Data are (adjusted)  $\beta$ -coefficient with 95% CI for the depressive symptom score through multilevel analysis (i.e., mixed models).

<sup>a</sup> Adjusted for age, ethnicity, and SES

**eTable 3.** Post Hoc Comparison of Sociodemographic and Clinical Variables Among OCP Users and Nonusers at Age 16 Years and at Age 13 Years When OCP Use Was Unlikely

|                                                                  | 13 years of age              |                           |                      | 16 years of age    |                  |                      |
|------------------------------------------------------------------|------------------------------|---------------------------|----------------------|--------------------|------------------|----------------------|
|                                                                  | No OCP use at age 16 (n=530) | OCP use at age 16 (n=306) | P Value <sup>a</sup> | No OCP use (n=536) | OCP use (n=309)  | P Value <sup>a</sup> |
| Dutch ethnicity, No./total No. (%)                               | 460/536 (85.8)               | 285/309 (92.2)            | .006                 | 460/536 (85.8)     | 285/309 (92.2)   | .006                 |
| SES, mean (SD) <sup>b</sup>                                      | 0.17 ± 0.78                  | -0.15 ± 0.71              | <.001                | 0.17 ± 0.78        | -0.15 ± 0.71     | <.001                |
| Virgin, No./total No. (%)                                        | 515/523 (98.5)               | 276/303 (91.1)            | <.001                | 424/533 (79.5)     | 74/303 (24.4)    | <.001                |
| Family functioning, mean (SD) <sup>c</sup>                       | 1.62 ± 0.39                  | 1.65 ± 0.40               | .31                  | 1.65 ± 0.39        | 1.67 ± 0.41      | .10                  |
| Stressful experiences in past 2 years, median (IQR) <sup>d</sup> | 2.00 (1.00-4.00)             | 3.00 (1.00-5.75)          | .003                 | 3.00 (2.00-6.00)   | 5.00 (3.00-7.00) | <.001                |
| Depressive symptom score, mean (SD)                              | 0.30 ± 0.28                  | 0.37 ± 0.30               | .001                 | 0.33 ± 0.30        | 0.40 ± 0.30      | .001                 |
| BMI, mean (SD)                                                   | 19.1 ± 3.3                   | 19.5 ± 3.2                | .12                  | 21.5 ± 3.12        | 22.0 ± 3.06      | .01                  |
| Age at menarche, mean (SD), y                                    | 12.3 ± 0.90                  | 12.1 ± 0.96               | .11                  | 13.0 ± 1.17        | 12.6 ± 1.15      | <.001                |
| Acne, No./total No. (%)                                          | 150/494 (30.4)               | 127/271 (46.9)            | <.001                | 203/267 (43.2)     | 107/244 (43.9)   | .87                  |

Abbreviations: BMI, body mass index (calculated as weight in kilograms divided by height in meters squared); OCP, oral contraceptive pill; SES, socioeconomic status.

All variables were assessed at both age 13 years (T2) and age 16 years (T3). SES and ethnicity are time-invariant variables (determined at study entry [T1]). Differences in these variables are therefore copied from the Table.

<sup>a</sup> Based on 2-tailed  $\chi^2$  tests for dichotomous variables or t tests or Mann Whitney U tests for continuous variables.

<sup>b</sup> Continuous scale based on the educational level, job, and income of the parents.

<sup>c</sup> Family functioning was assessed by a modified version of the General Functioning Scale of the McMaster Family Assessment Device.<sup>1</sup> A higher scores indicate worse levels of family functioning.

<sup>d</sup> Stressful experiences were assessed with the question “How many stressful experiences have you gone through in the past 2 years?”. The answer was rated on a continuous scale between 0 and 10, where 0 indicated no stressful experiences and 10 indicated many stressful experiences.

**eReference.**

1. Epstein NB, Baldwin LM, Bishop DS. The McMaster family assessment device. In. Vol 9: Journal of Marital and Family Therapy; 1983:171-180.
